# Supplementary material for: Effect of Cationic Lipid Nanoparticle Loaded siRNA with Stearylamine against Chikungunya Virus
Source: MDPI journal article supplement (doi:10.3390/molecules27041170), 2022-02-09
Supplement: s1 [file s1]

## Supplementary Materials

### Effect of Cationic Lipid Nanoparticle Loaded siRNA with Stearylamine against Chikungunya Virus

Manish Kumar Jeengar <sup>1,2,†</sup>, Mallesh Kurakula <sup>3,4,†</sup>, Poonam Patil <sup>1</sup>, Ashwini More <sup>1</sup>, Ramakrishna Sistla <sup>3,\*</sup> and Deepti Parashar <sup>1,\*</sup>

<sup>1</sup> ICMR-National Institute of Virology, 20-A, Dr. Ambedkar Road, Pune 411001, Maharashtra, India; manishkumarj@pharmacy.aims.amrita.edu (M.K.J.); poonamshewale07@rediffmail.com (P.P.); ashwini05.s@gmail.com (A.M.)

<sup>2</sup> Department of Pharmacology, Amrita School of Pharmacy, Amrita Vishwa Vidyapeetham, AIMS Health Sciences Campus, Kochi 682041, Kerala, India

<sup>3</sup> CSIR-Indian Institute of Chemical Technology [CSIR-IICT], Hyderabad 500007, Telangana, India; mallesh\_kurakula@yahoo.com

<sup>4</sup> Product Development, CURE Pharmaceutical, Oxnard, CA 93033, USA.

\* Correspondence: sistla@csiriict.in (R.S.); deeptiparasharster@gmail.com (D.P.)

† These authors contributed equally to this work.

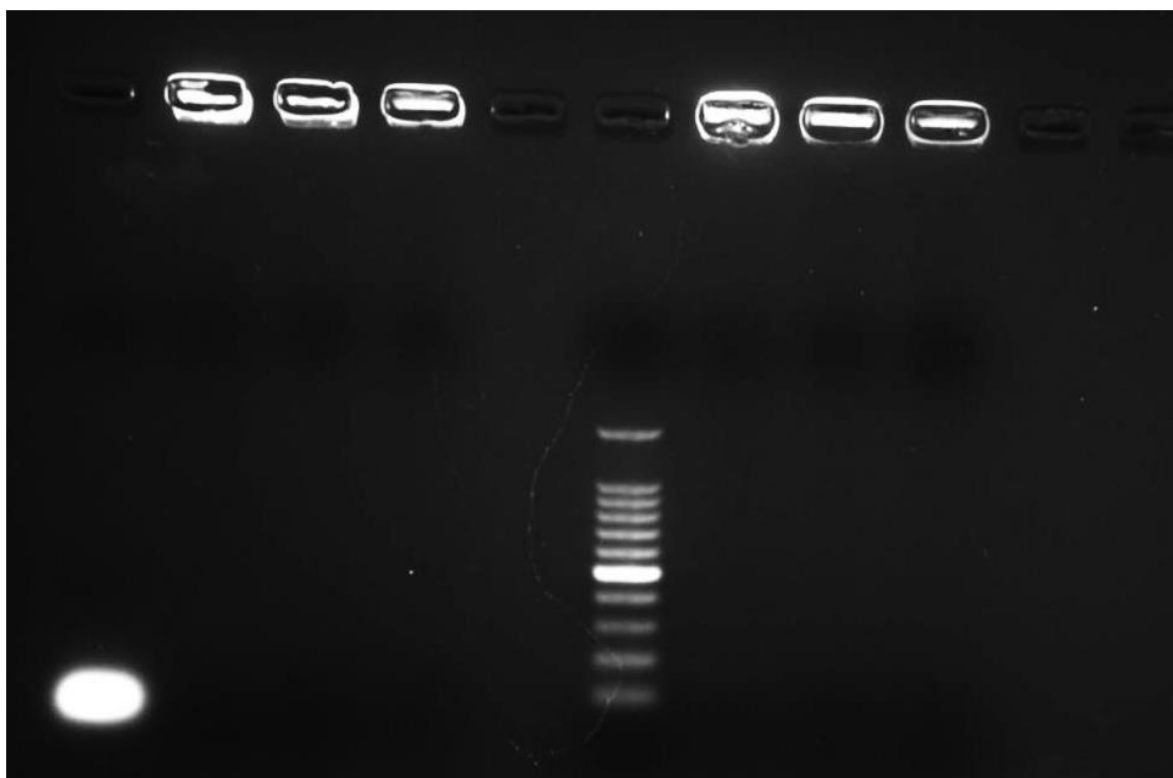

**Figure S1.** Agarose Gel electrophoresis results shows formation of Stable complexation of siRNA – F4 SLN; Lane 1 Naked siRNA; Lane 2–4 siRNA complexed with cationic SLN incubated at 4 °C; Lane 5 Blank SLN; Lane 6 DNA ladder; Lane 7–9, siRNA complexed with cationic SLN incubated at 37 °C.
